# Supplementary material for: Insecticidal effect of new synthesized chalcone derivatives on Caribbean fruit fly, Anastrepha suspensa
Source: publisher site journal article supplement (doi:10.1515/znc-2024-0005), 2024-05-02
Supplement: Supplementary file 1 [file j_znc-2024-0005_suppl_001.docx]

**-Supplementary Materials-**

**Insecticidal effect of new synthesized chalcone derivatives on Caribbean fruit fly, *Anastrepha suspensa***

Sümeyye Yücetepe1, Bedia Koçyiğit-Kaymakçıoğlu2, Xiangbing Yang3, Nurhayat Tabanca3* and Fatih Tok4*

1 Institute of Health Sciences, Marmara University, 34865, Istanbul, Turkiye

2 Department of Pharmaceutical Chemistry, Faculty of Pharmacy, Biruni University, 34015, Istanbul, Turkiye

3 United States Department of Agriculture-Agricultural Research Service (USDA-ARS), Subtropical Horticulture Research Station (SHRS), 13601 Old Cutler Rd., Miami, FL 33158, USA

4 Department of Pharmaceutical Chemistry, Faculty of Pharmacy, Marmara University, 34854, Istanbul, Turkey

*Corresponding authors: [fatih.tok@marmara.edu.tr](mailto:fatih.tok@marmara.edu.tr); [nurhayat.tabanca@usda.gov](mailto:nurhayat.tabanca@usda.gov)

**LIST OF CONTENTS**

**Figure S1**. IR spectrum for **3**.

**Figure S2**. 1H-NMR spectrum for **3**.

**Figure S3**. 13C-NMR spectrum for **3**.

**Figure S4**. IR spectrum for **5**.

**Figure S5**. 1H-NMR spectrum for **5**.

**Figure S6**. 13C-NMR spectrum for **5**.

**Figure S7**. IR spectrum for **7**.

**Figure S8**. 1H-NMR spectrum for **7**.

**Figure S9**. 13C-NMR spectrum for **7**.

**Figure S10**. IR spectrum for **8**.

**Figure S11**. 1H-NMR spectrum for **8**.

**Figure S12**. 13C-NMR spectrum for **8**.

**Figure S13**. IR spectrum for **9**.

**Figure S14**. 1H-NMR spectrum for **9**.

**Figure S15**. 13C-NMR spectrum for **9**.

**Figure S16**. IR spectrum for **10**.

**Figure S17**. 1H-NMR spectrum for **10**.

**Figure S18**. 13C-NMR spectrum for **10**.

**Figure S19**. IR spectrum for **11**.

**Figure S20**. 1H-NMR spectrum for **11**.

**Figure S21**. 13C-NMR spectrum for **11**.

**Figure S22**. IR spectrum for **12**.

**Figure S23**. 1H-NMR spectrum for **12**.

**Figure S24**. 13C-NMR spectrum for **12**.

**Figure S25**. IR spectrum for **13**.

**Figure S26**. 1H-NMR spectrum for **13**.

**Figure S27**. 13C-NMR spectrum for **13**.

**Figure S28**. IR spectrum for **14**.

**Figure S29**. 1H-NMR spectrum for **14**.

**Figure S30**. 13C-NMR spectrum for **14**.

**
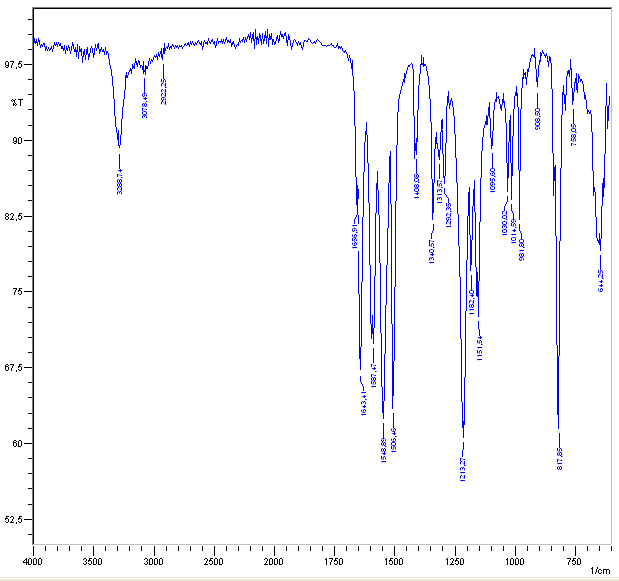
**

**Figure S1**. IR spectrum for **3**.


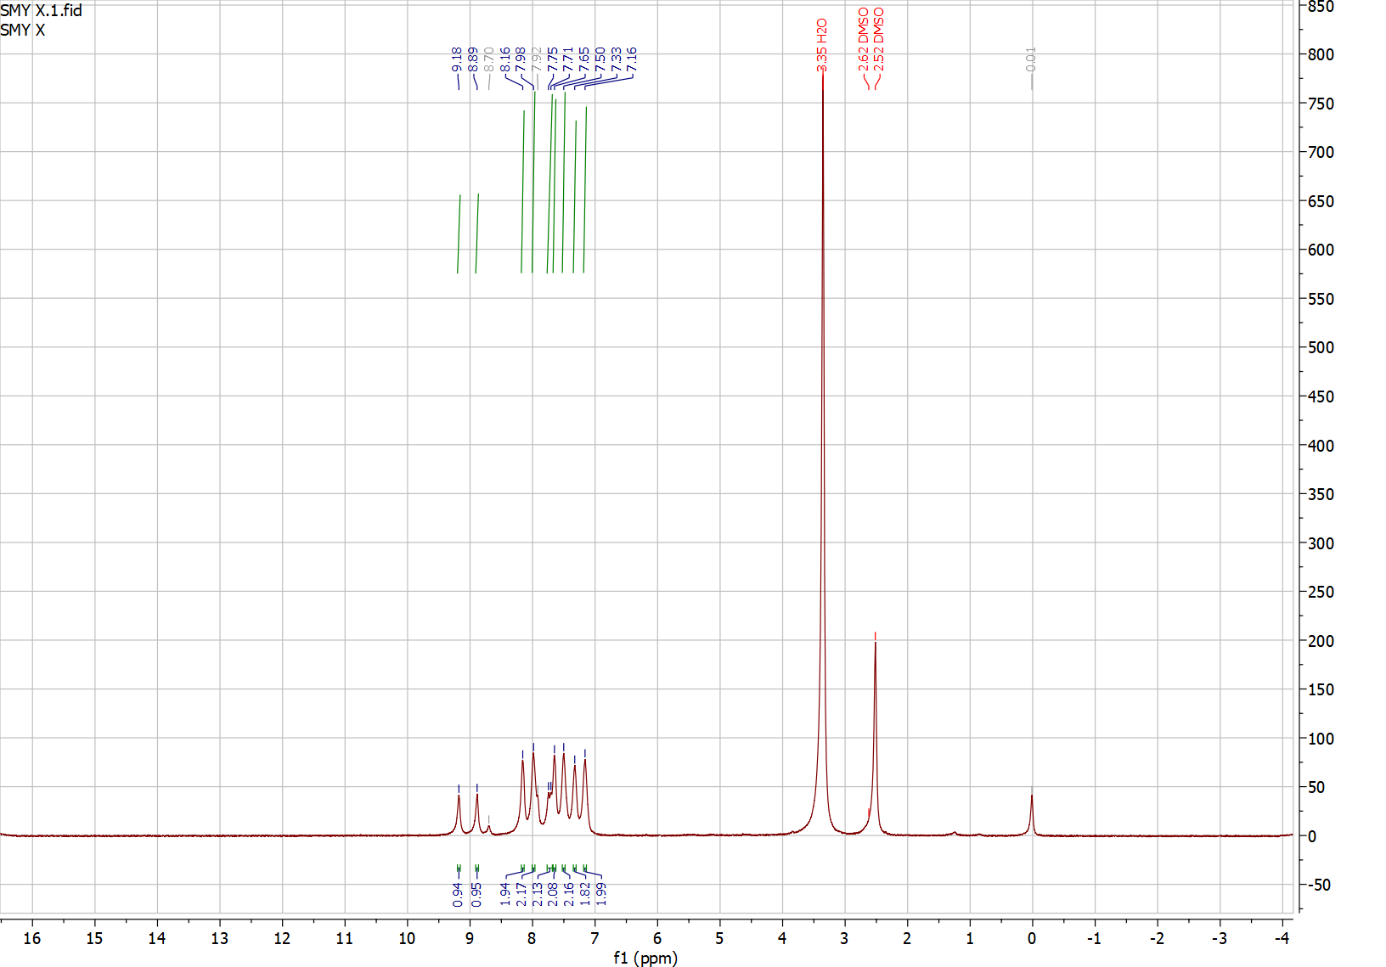


**Figure S2**. 1H-NMR spectrum for **3**.


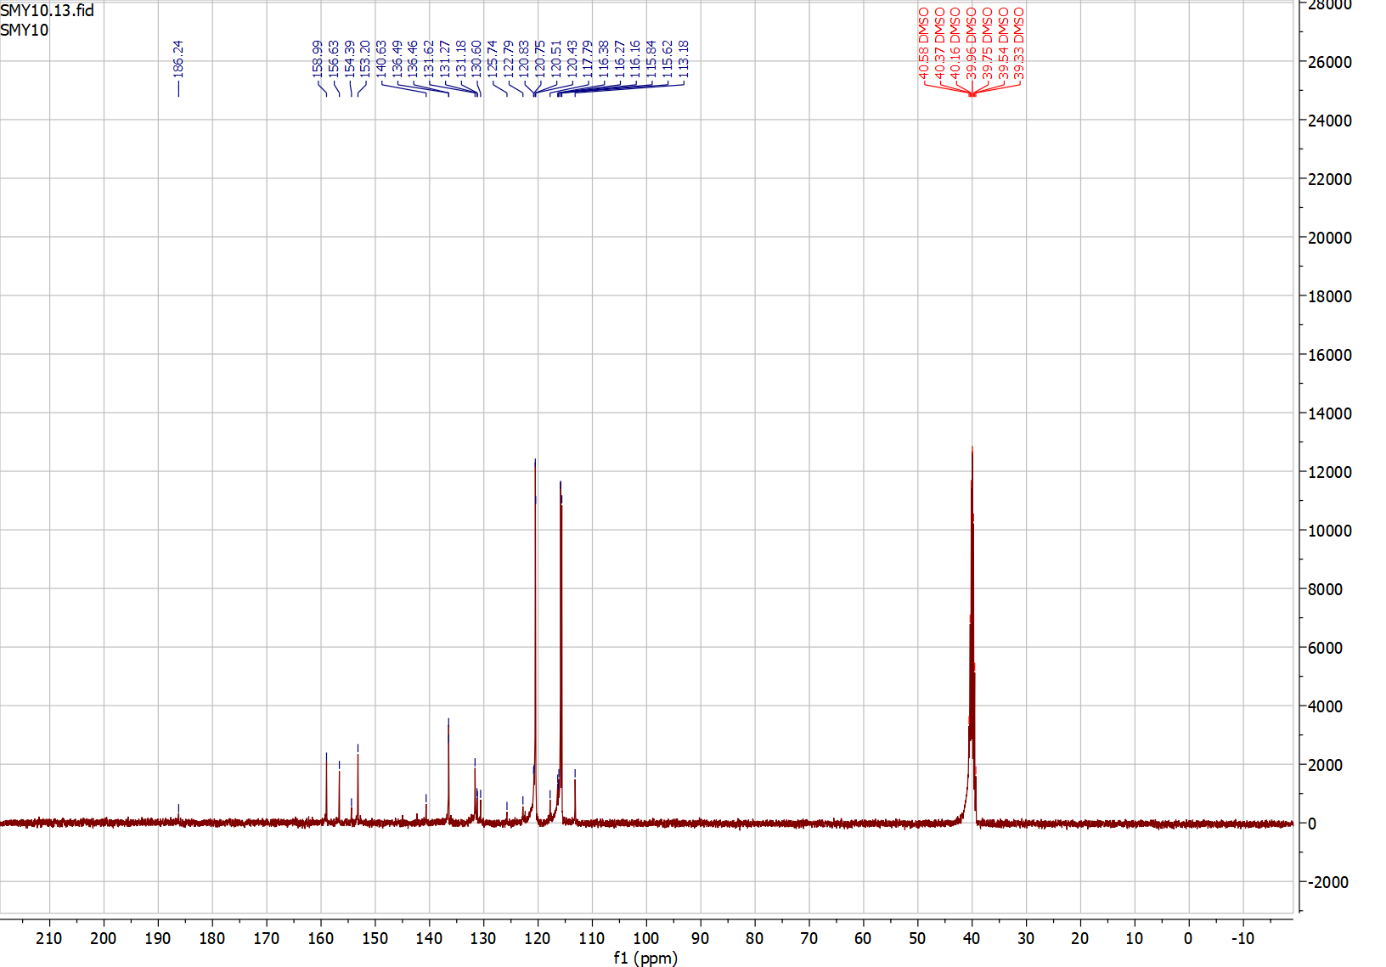


**Figure S3**. 13C-NMR spectrum for **3**.


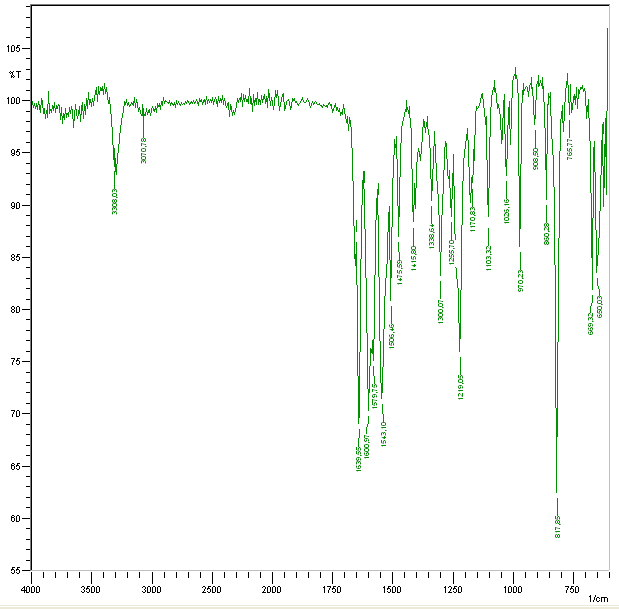


**Figure S4**. IR spectrum for **5**.


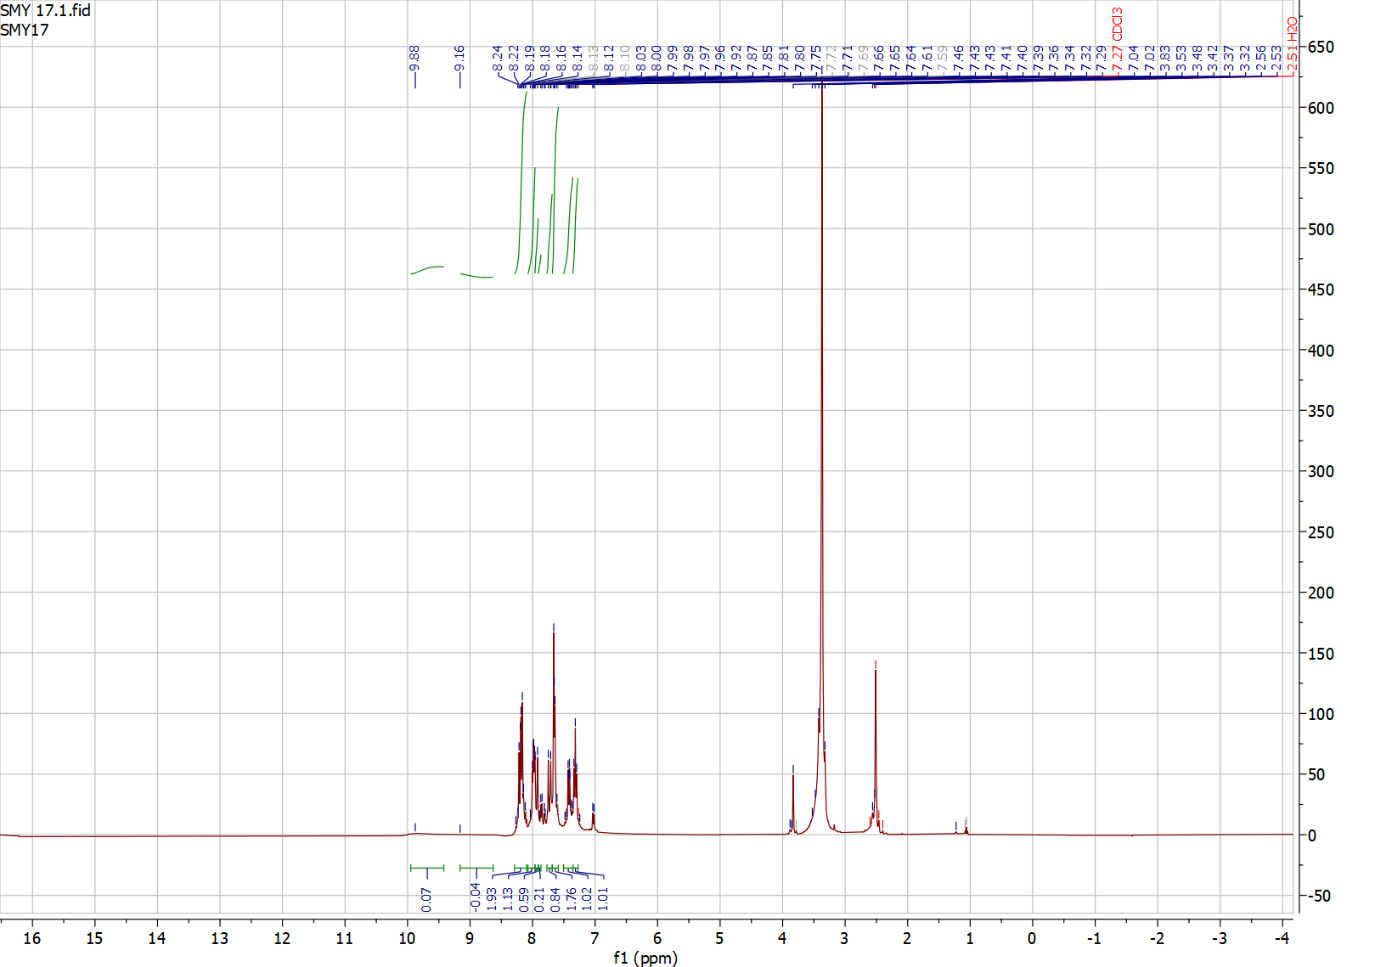


**Figure S5**. 1H-NMR spectrum for **5**.


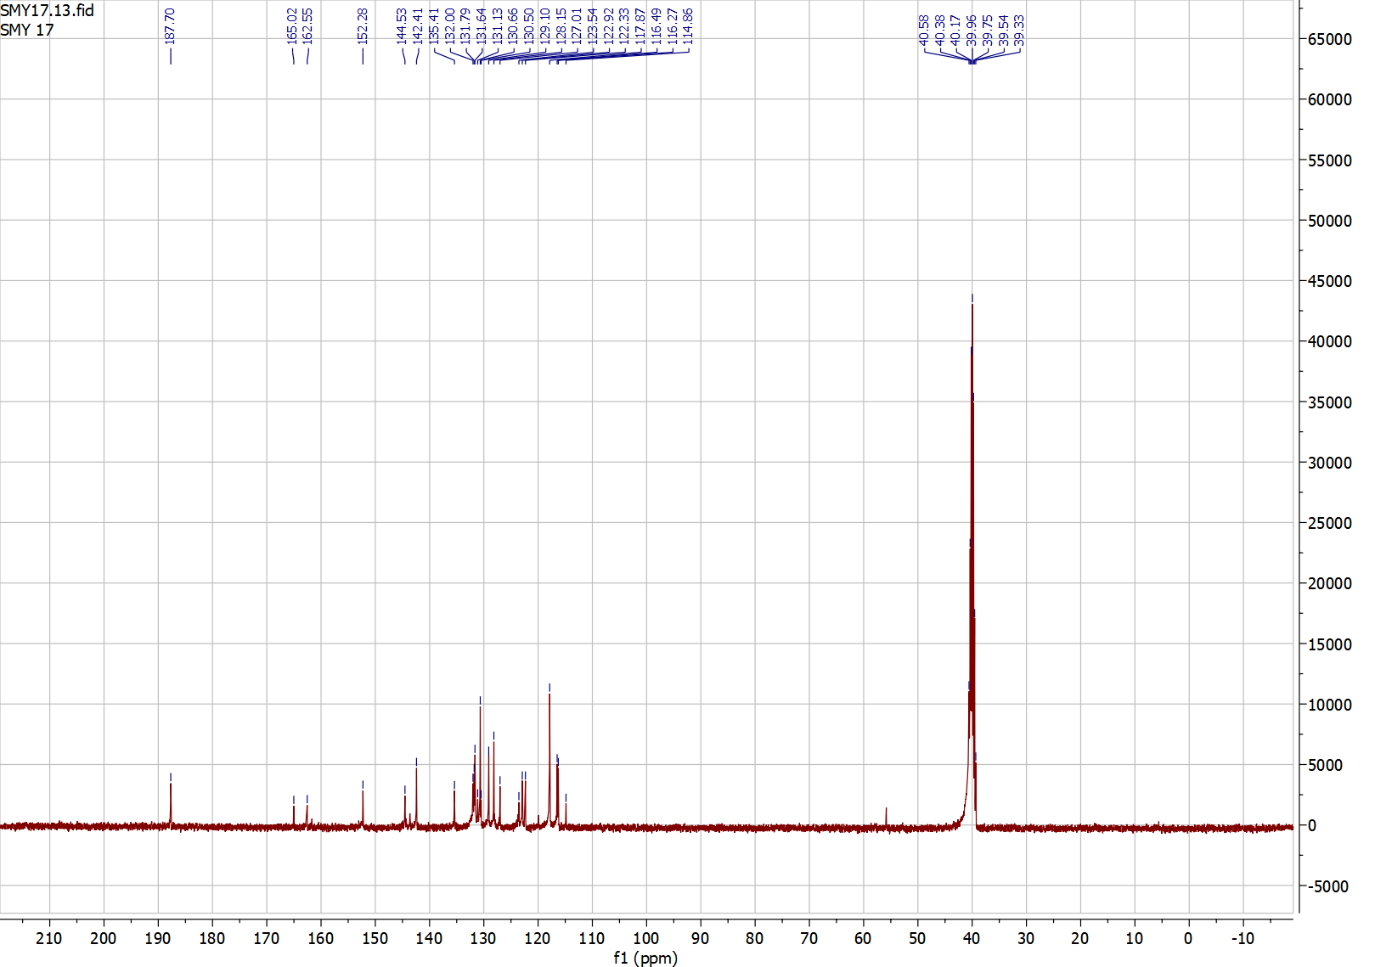


**Figure S6**. 13C-NMR spectrum for **5**.


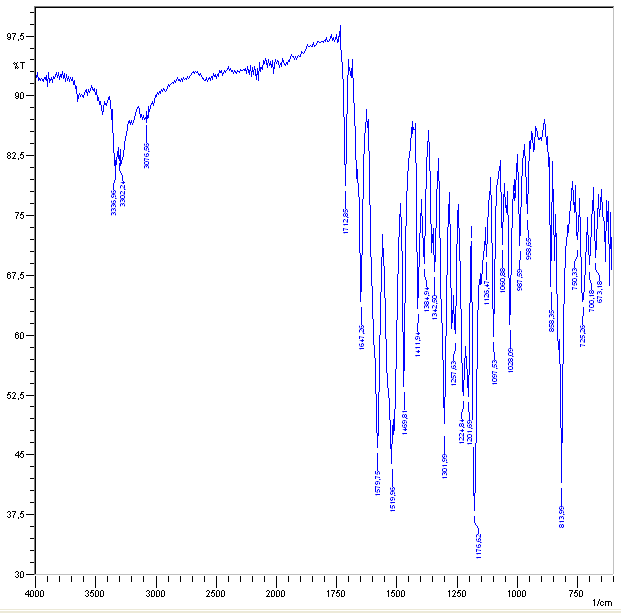


**Figure S7**. IR spectrum for **7**.


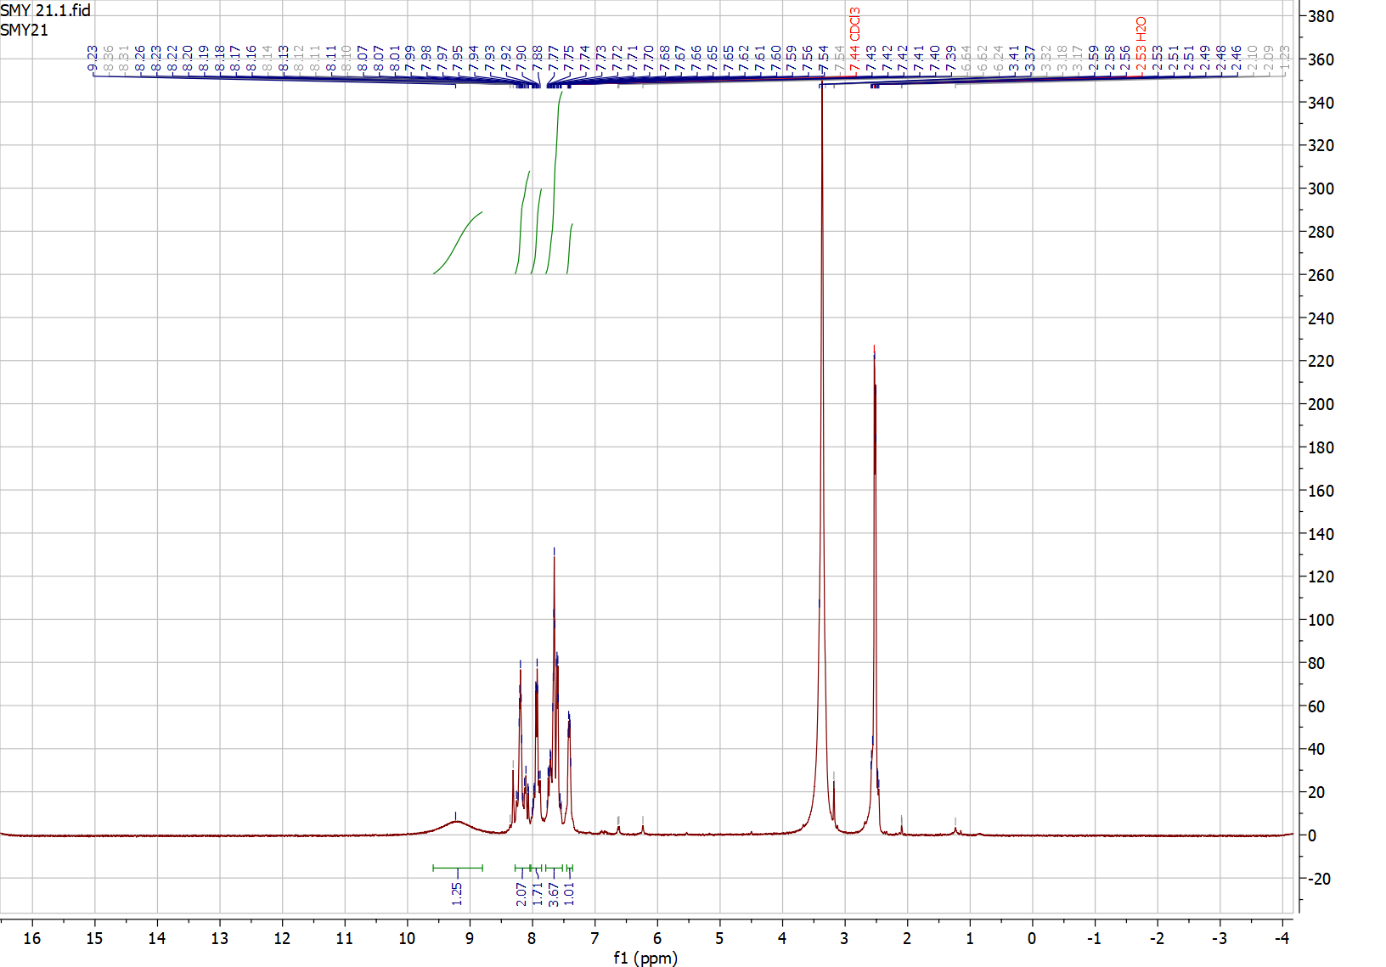


**Figure S8**. 1H-NMR spectrum for **7**.


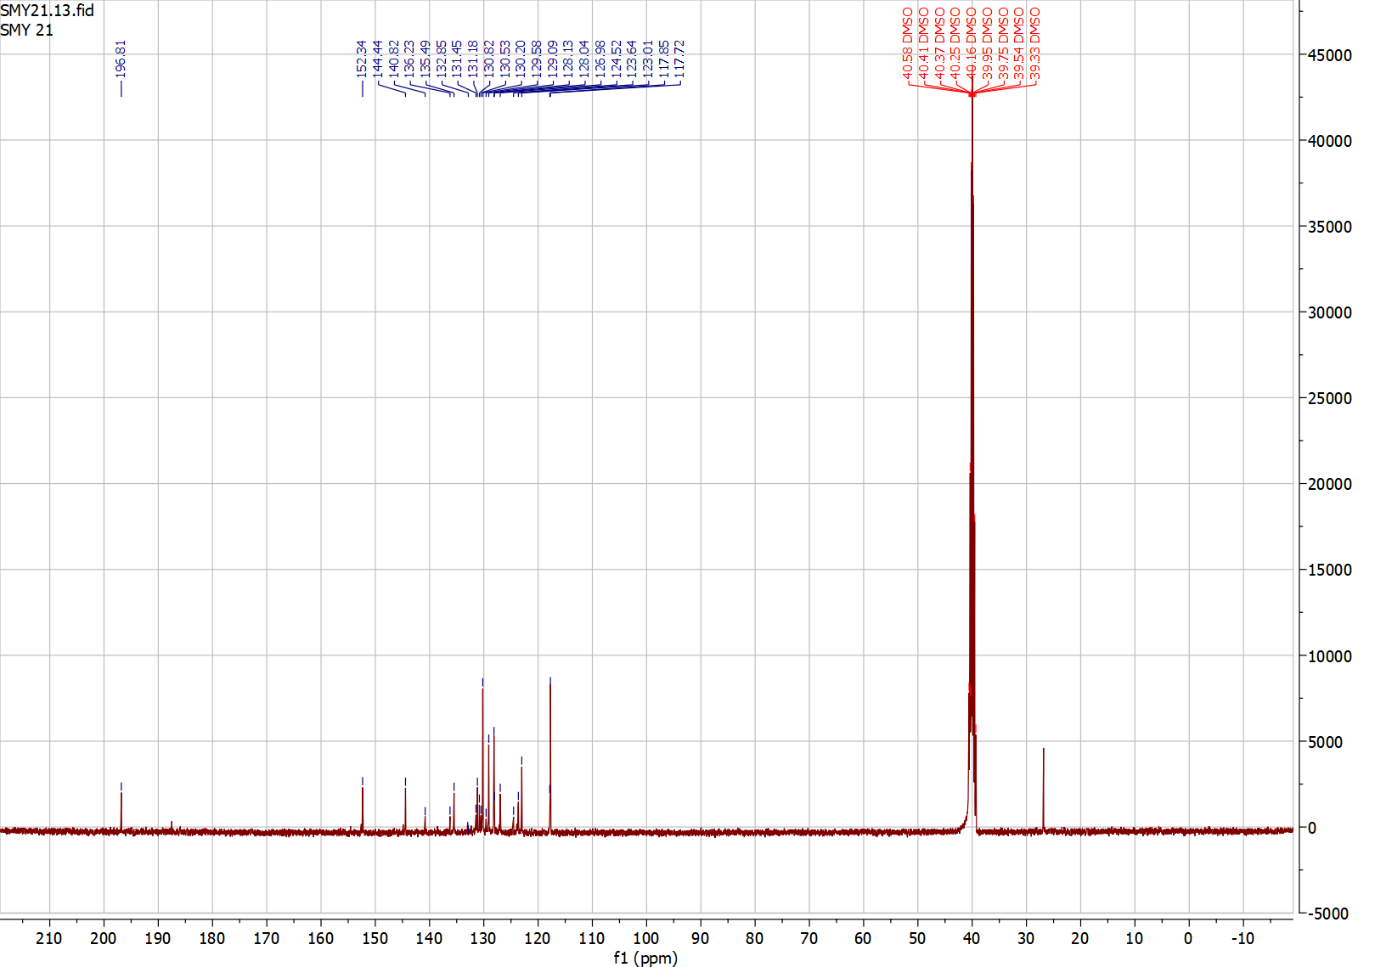


**Figure S9**. 13C-NMR spectrum for **7**.


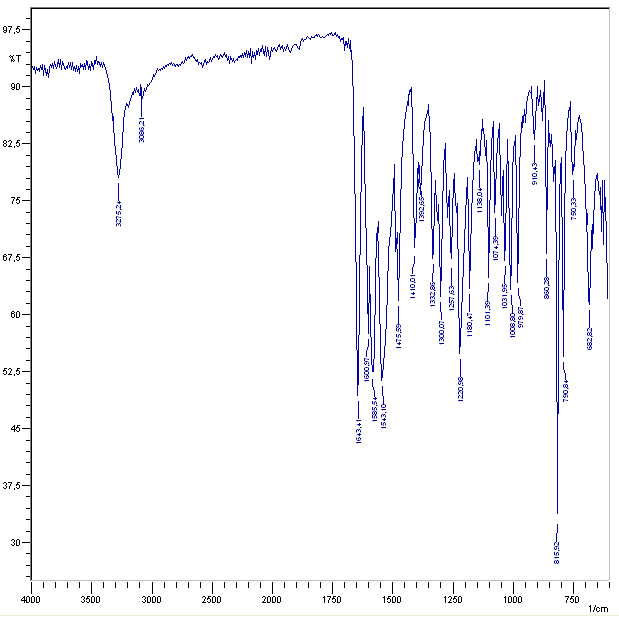


**Figure S10**. IR spectrum for **8**.


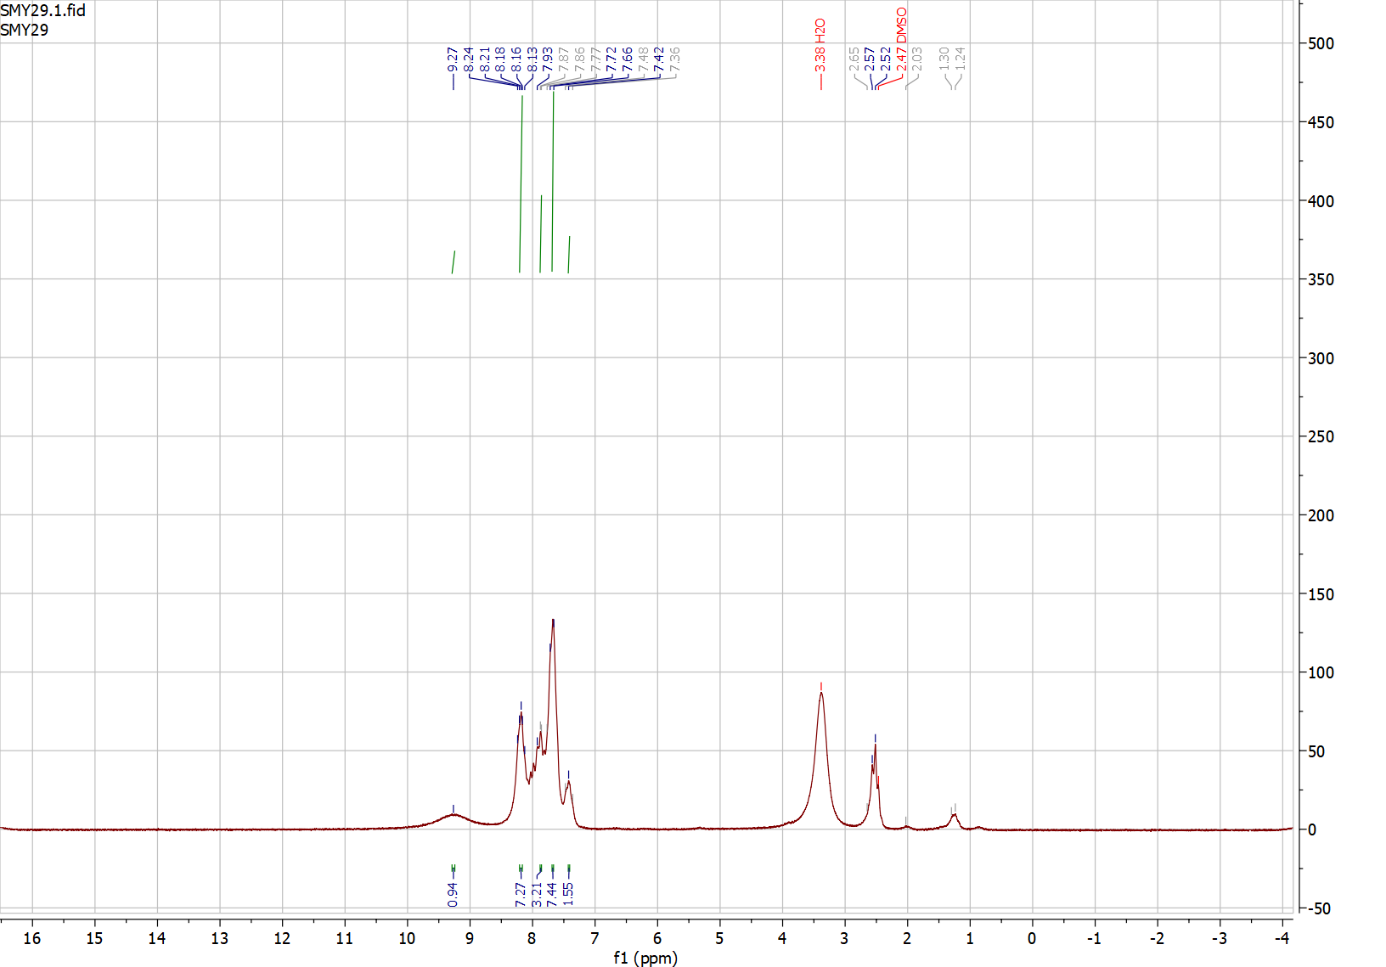


**Figure S11**. 1H-NMR spectrum for **8**.


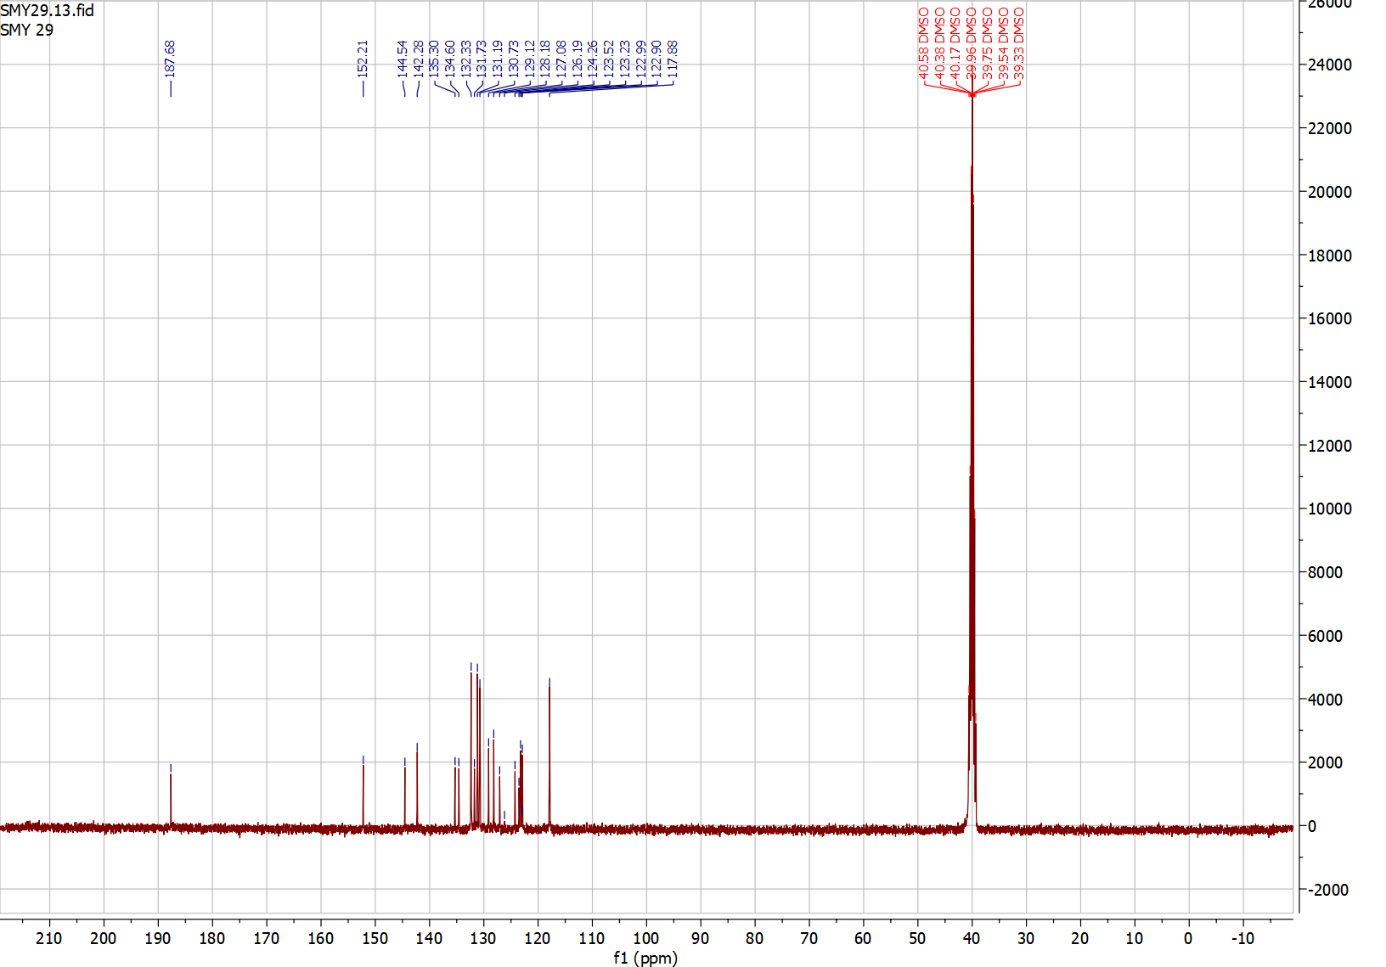


**Figure S12**. 13C-NMR spectrum for **8**.


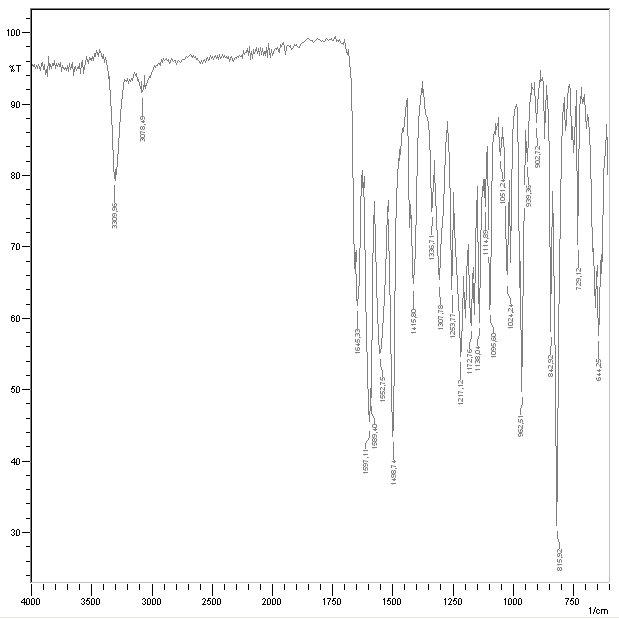


**Figure S13**. IR spectrum for **9**.


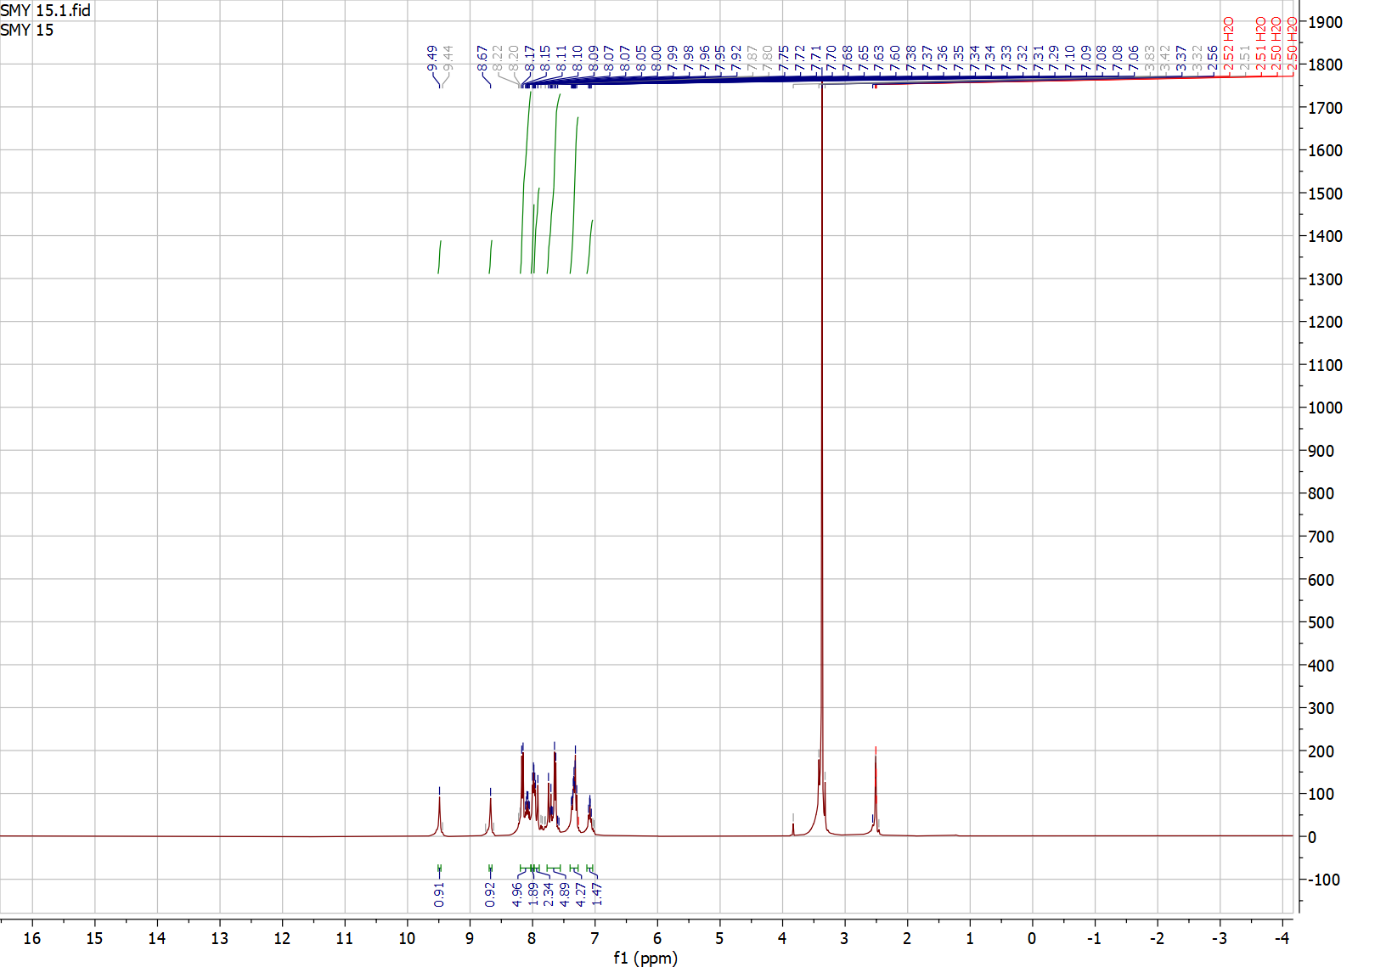


**Figure S14**. 1H-NMR spectrum for **9**.


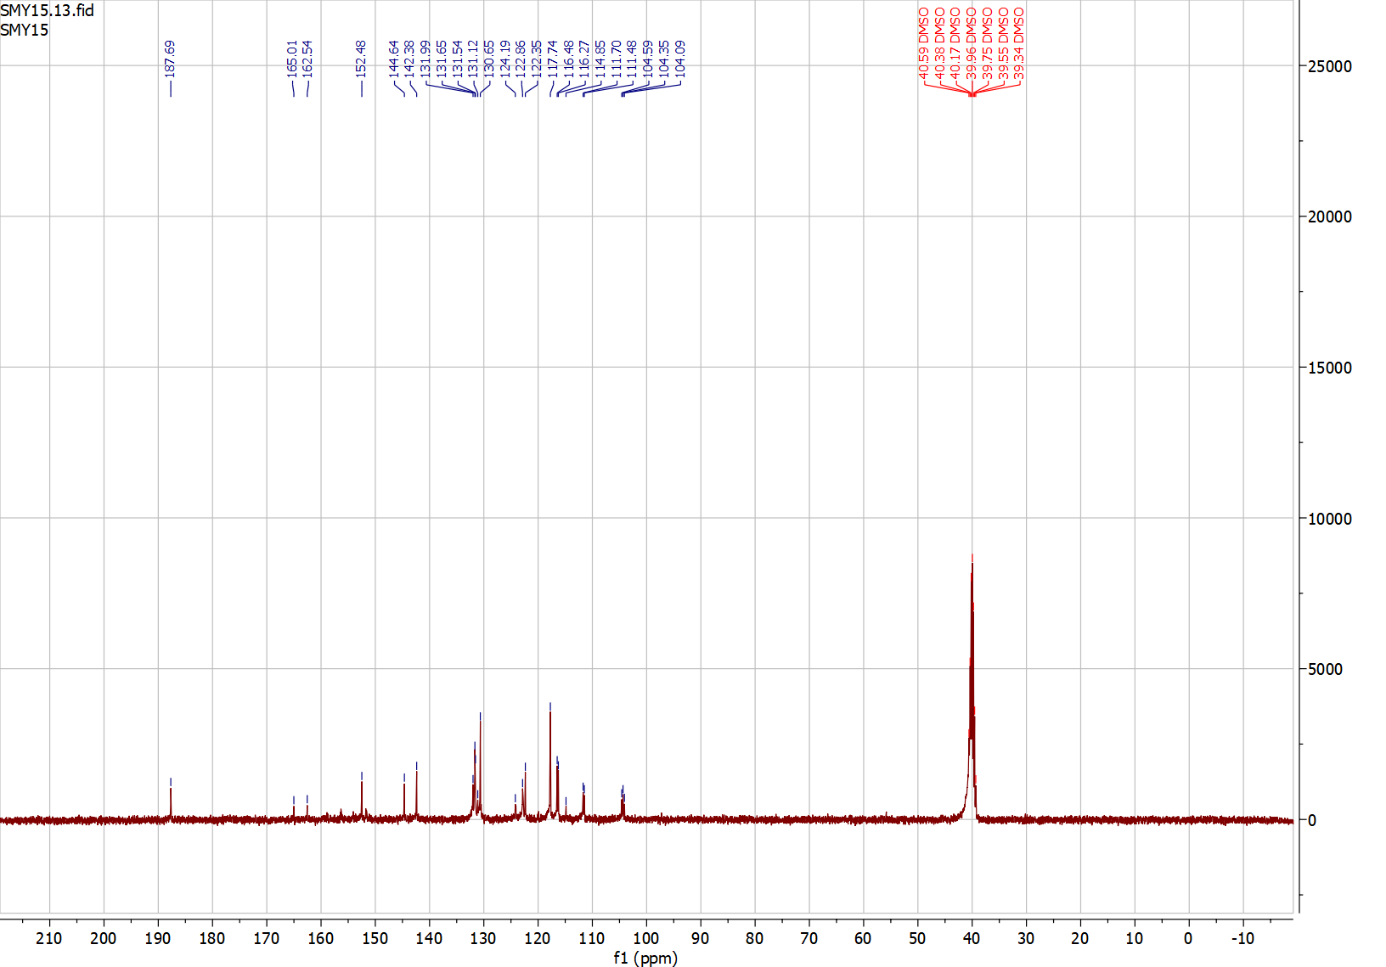


**Figure S15**. 13C-NMR spectrum for **9**.


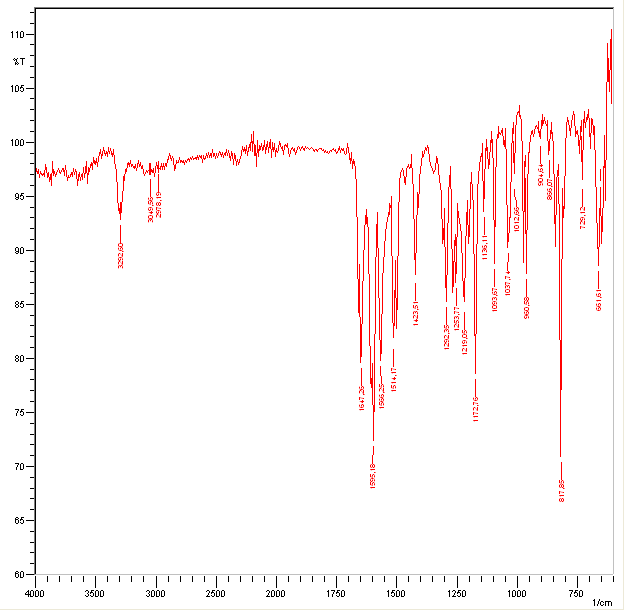


**Figure S16**. IR spectrum for **10**.


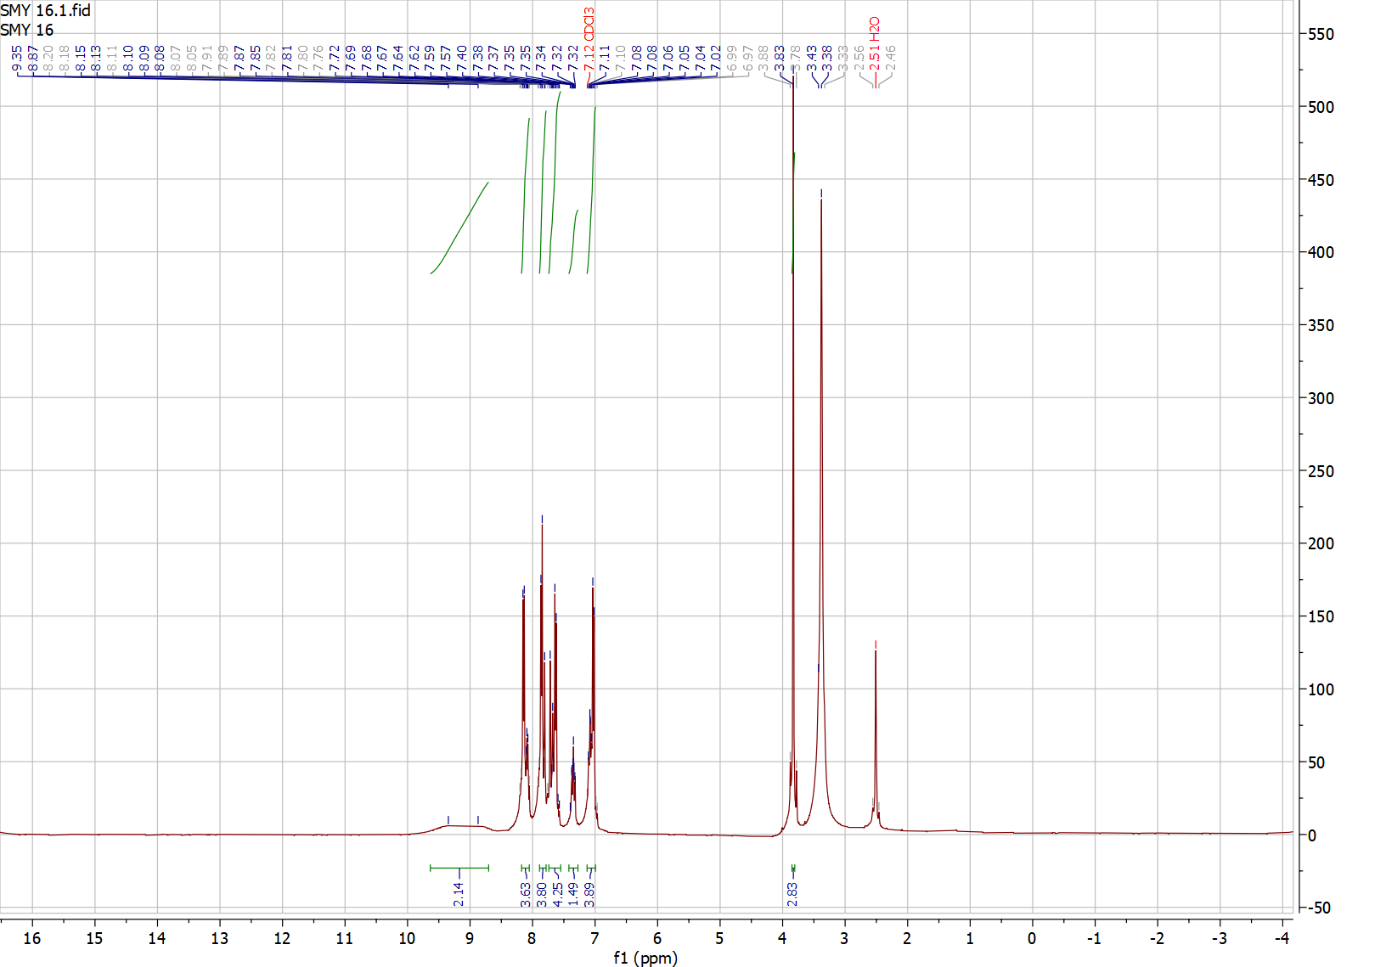


**Figure S17**. 1H-NMR spectrum for **10**.


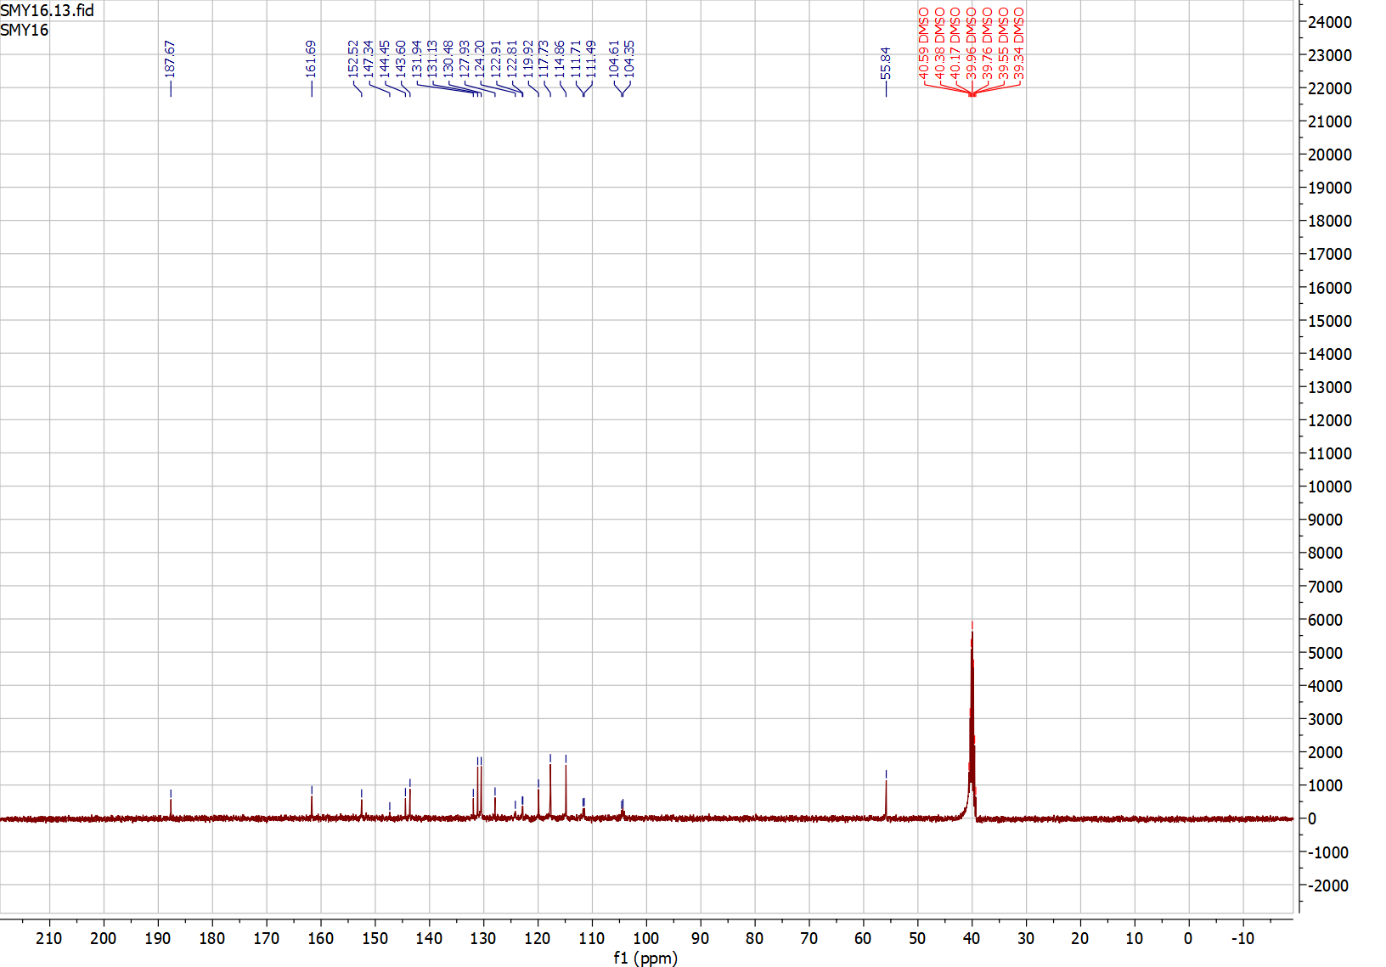


**Figure S18**. 13C-NMR spectrum for **10**.


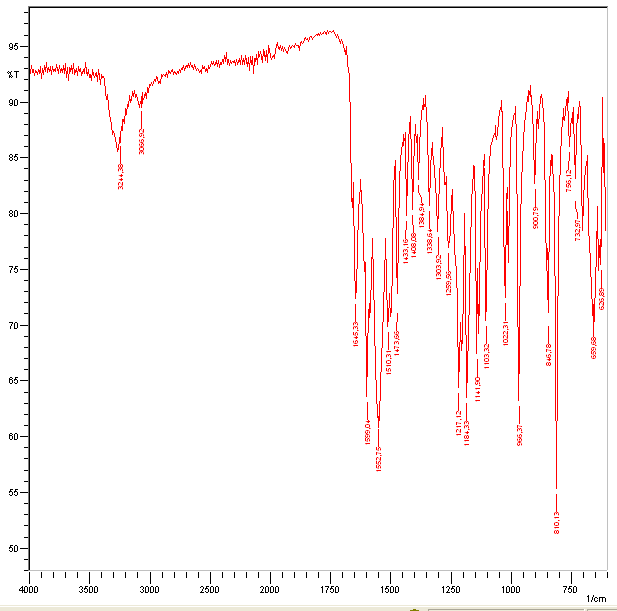


**Figure S19**. IR spectrum for **11**.


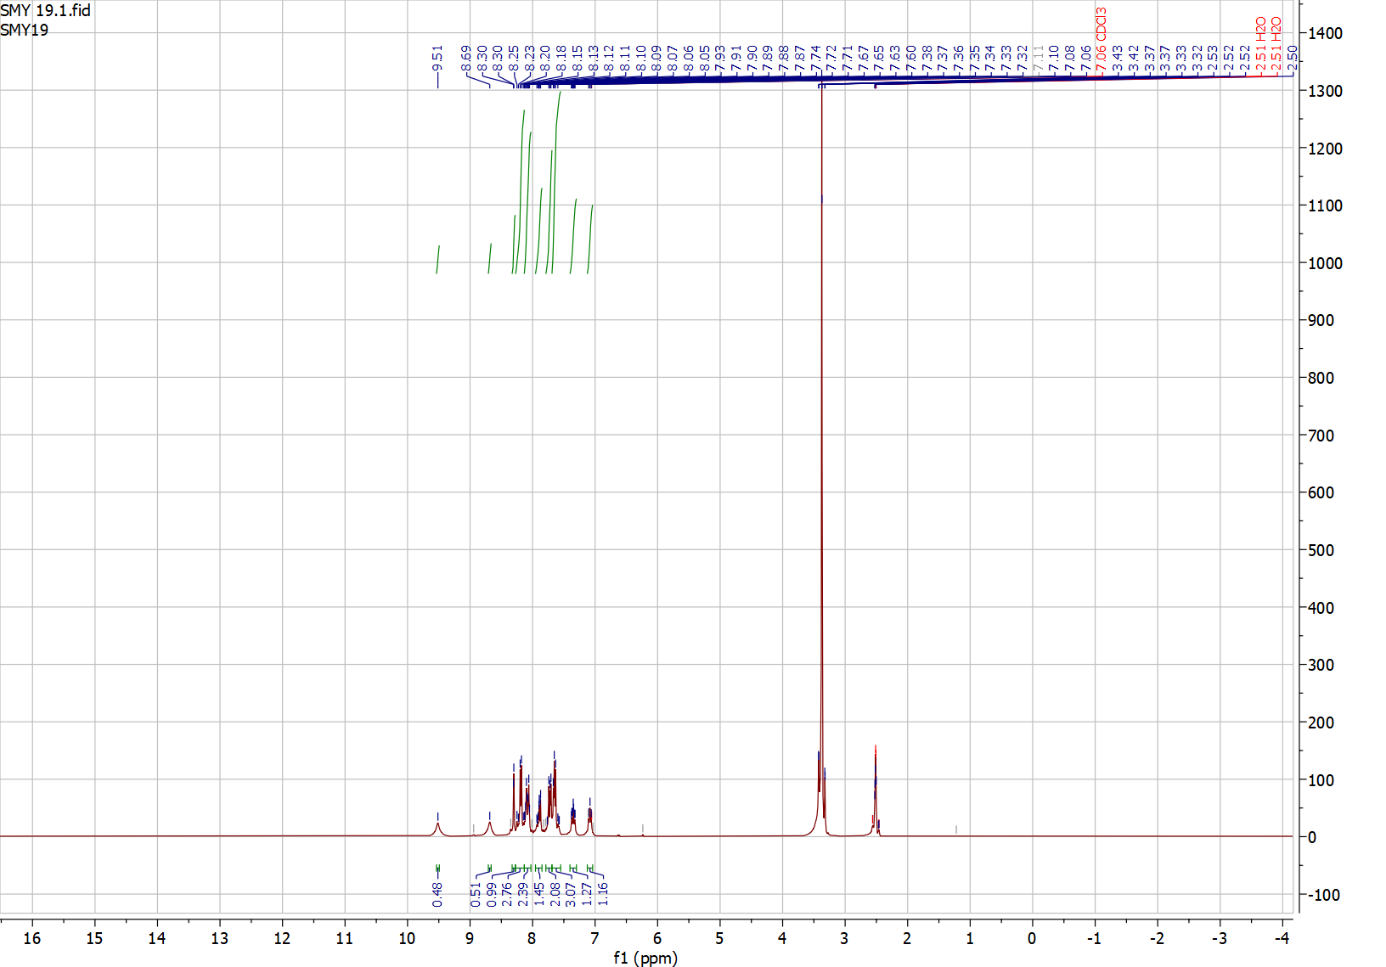


**Figure S20**. 1H-NMR spectrum for **11**.


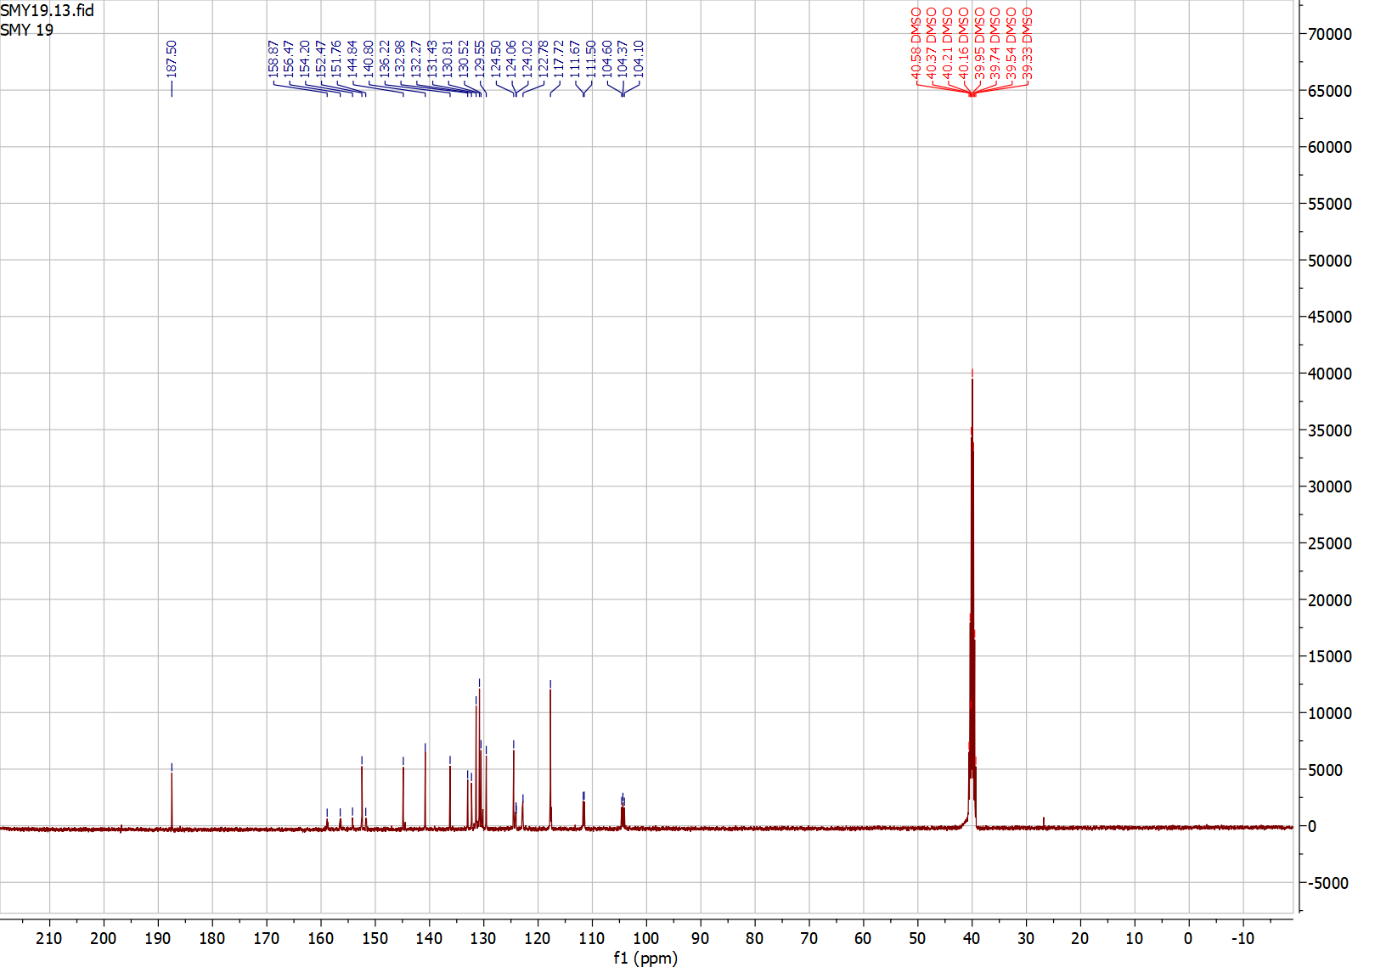


**Figure S21**. 13C-NMR spectrum for **11**.


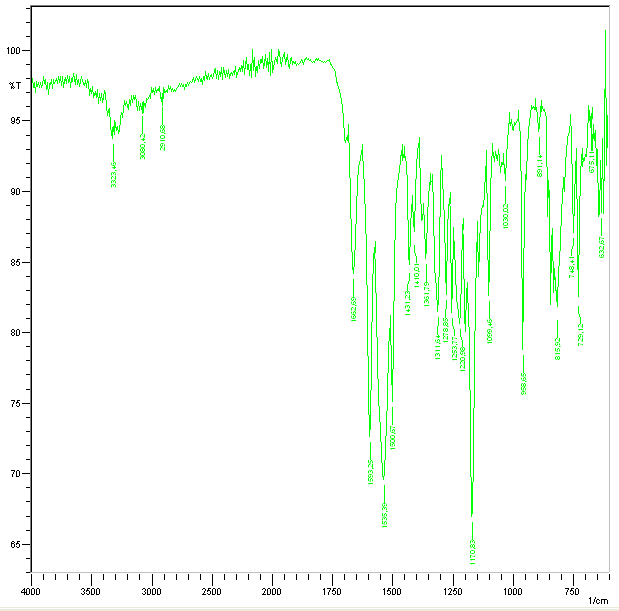


**Figure S22**. IR spectrum for **12**.


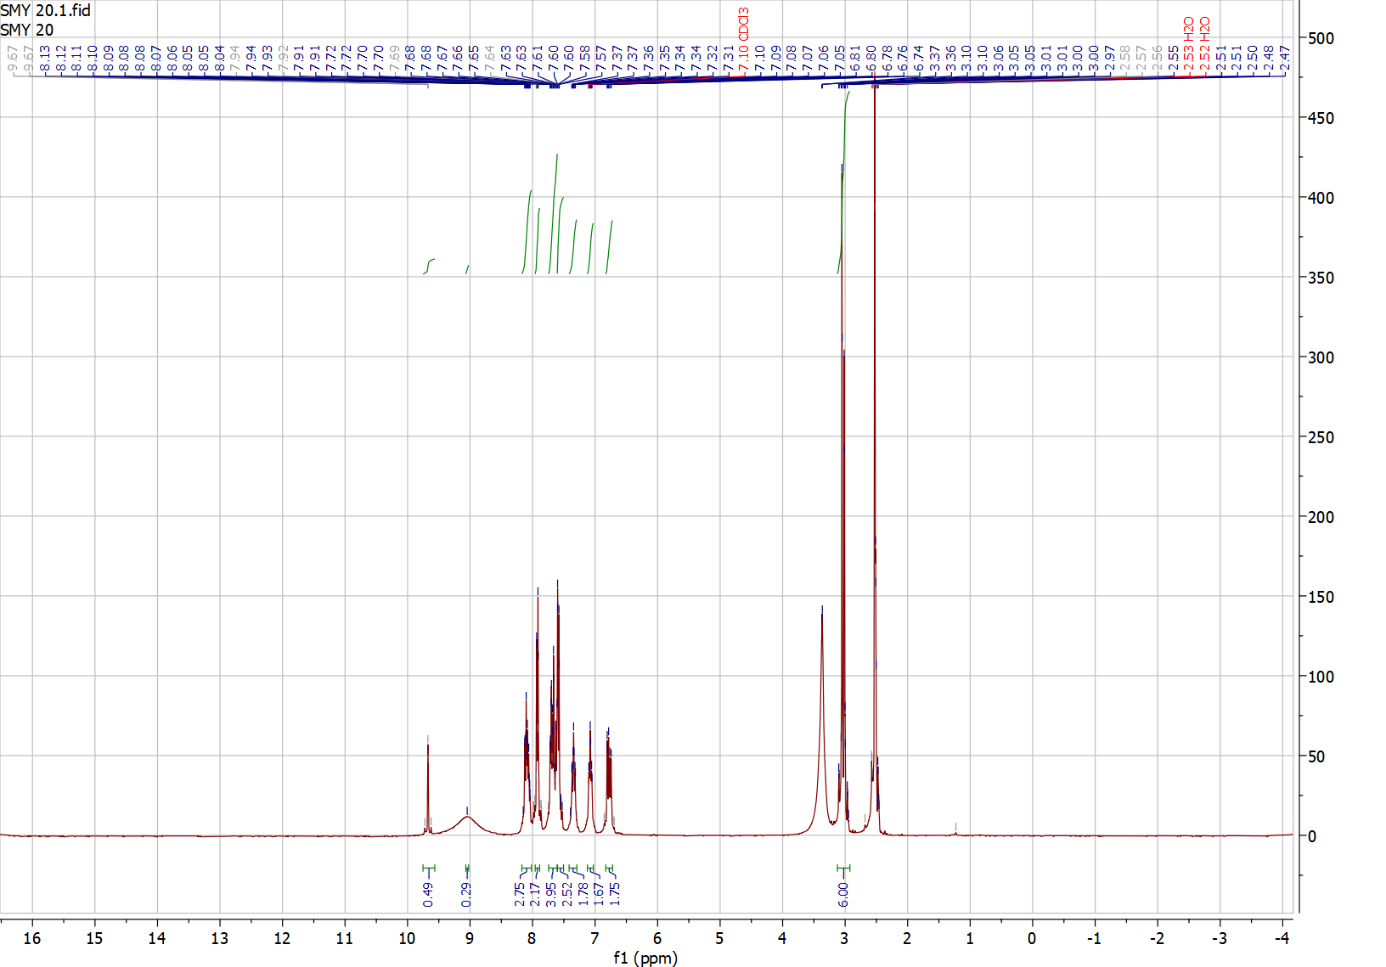


**Figure S23**. 1H-NMR spectrum for **12**.


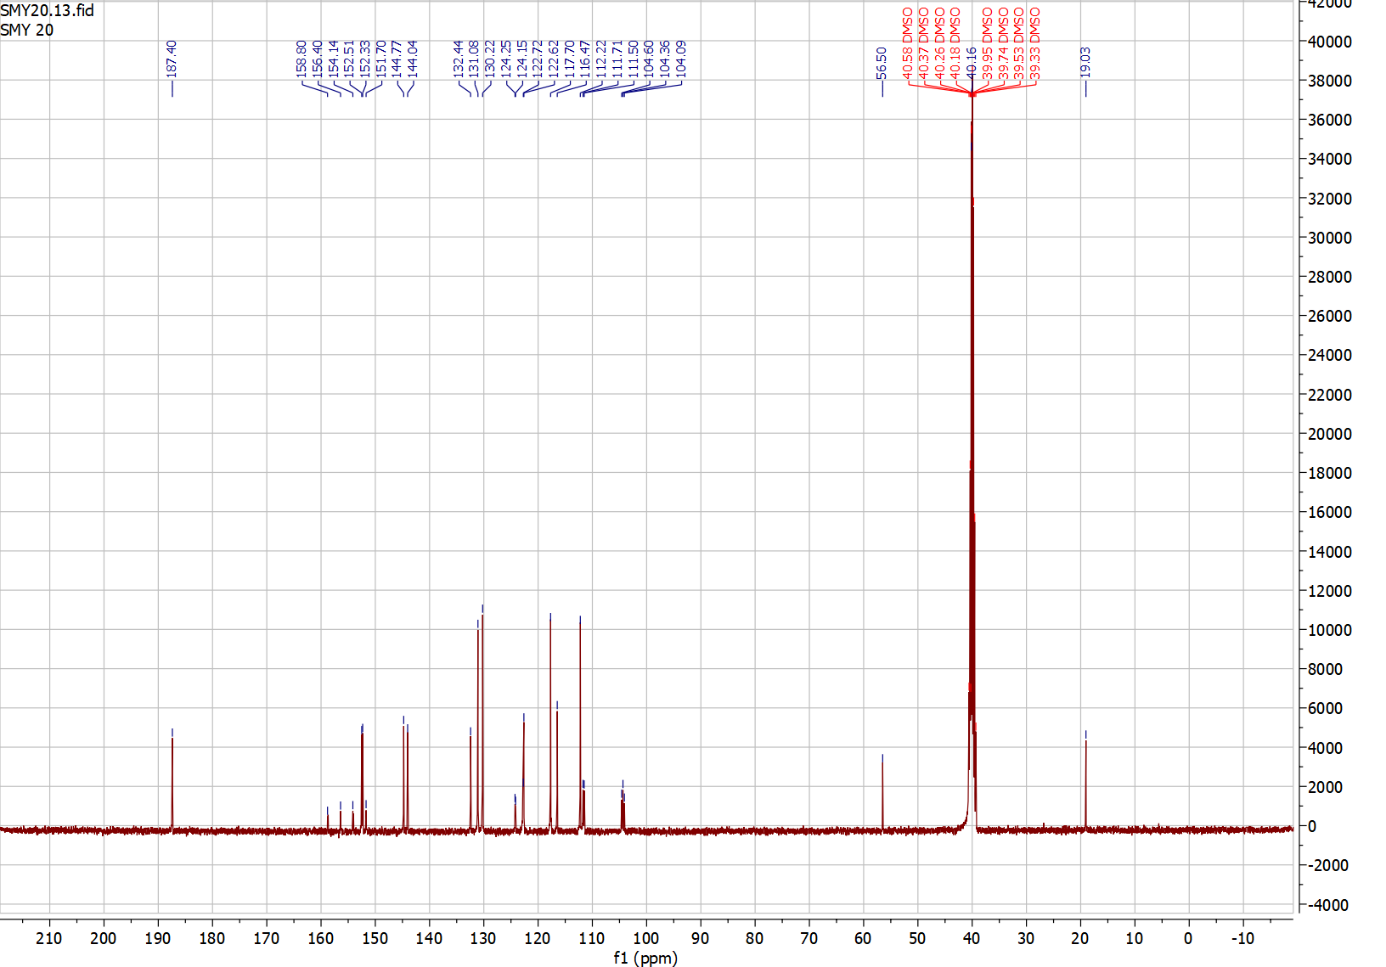


**Figure S24**. 13C-NMR spectrum for **12**.


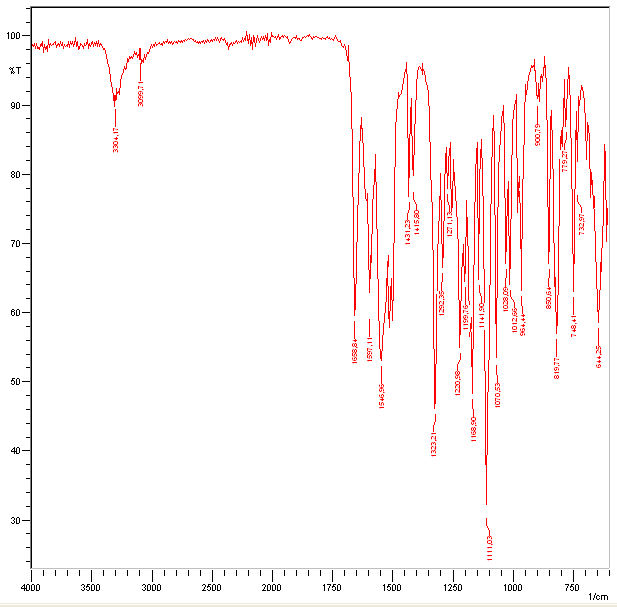


**Figure S25**. IR spectrum for **13**.


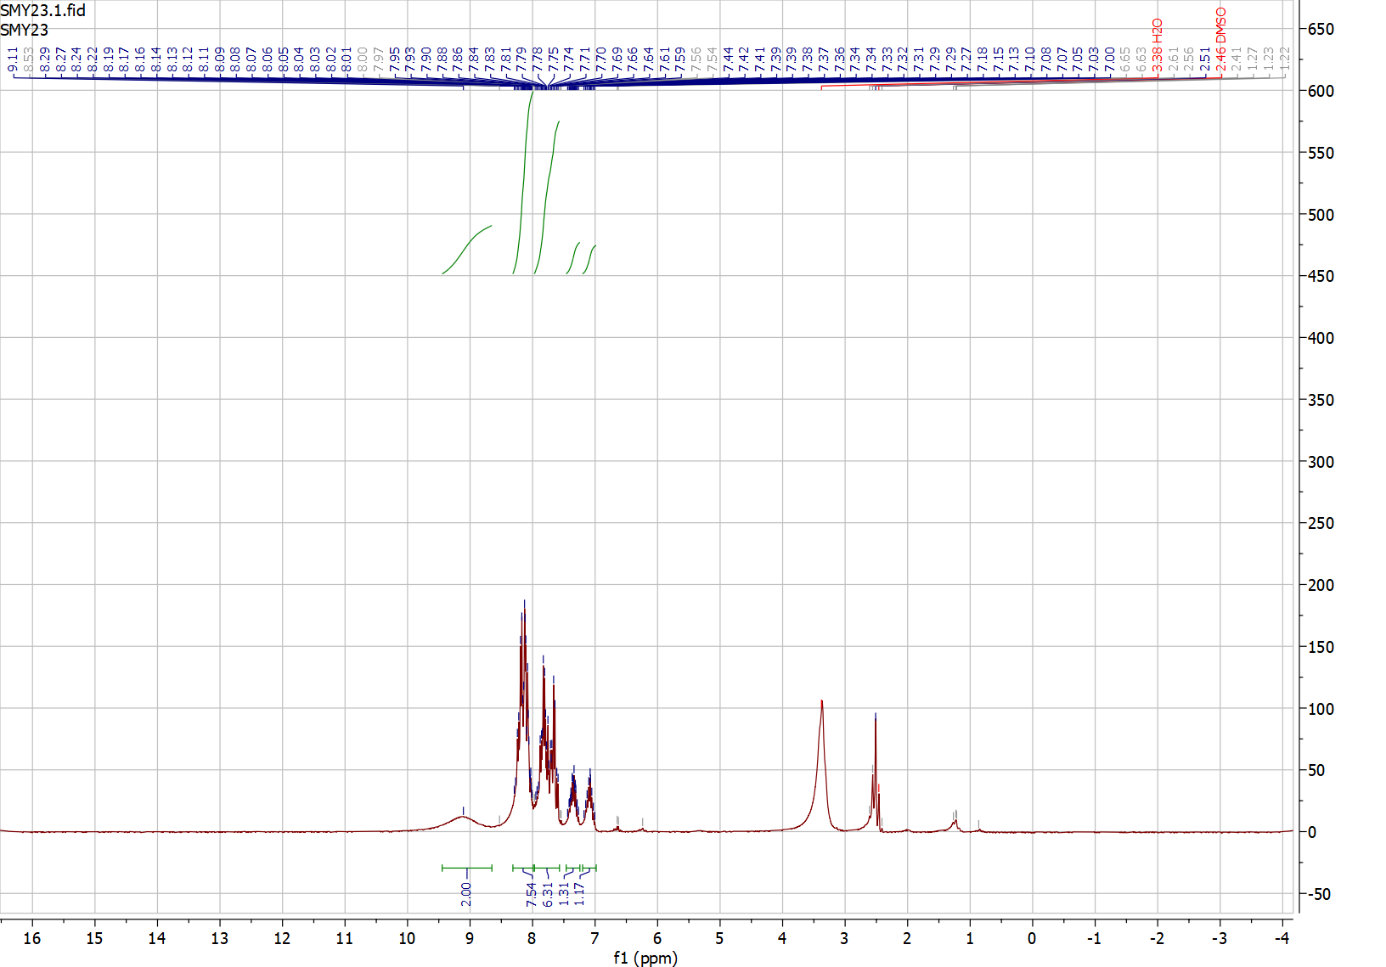


**Figure S26**. 1H-NMR spectrum for **13**.


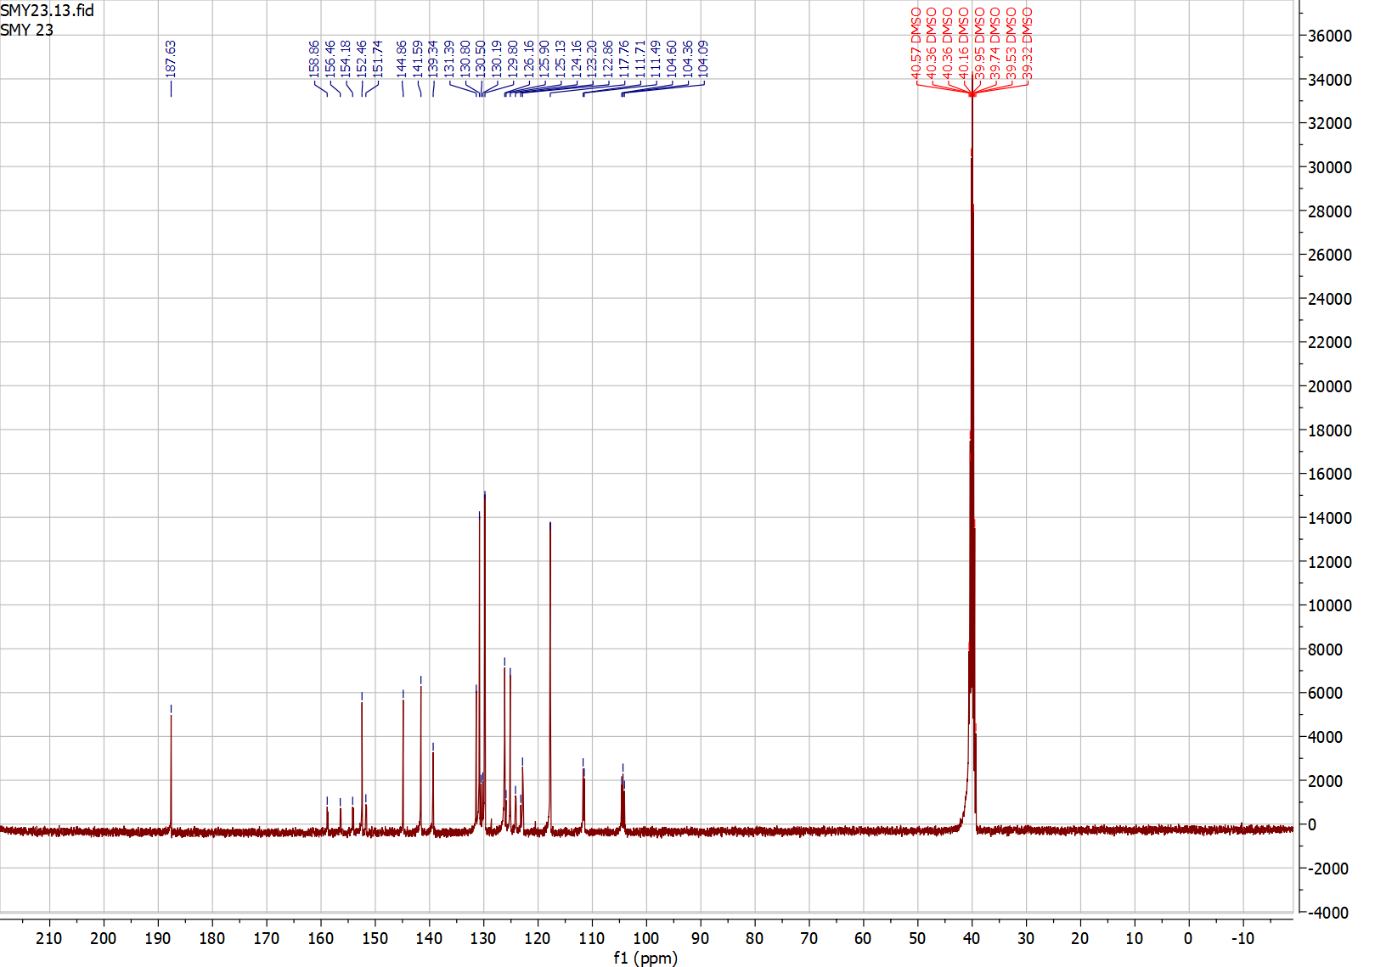


**Figure S27**. 13C-NMR spectrum for **13**.


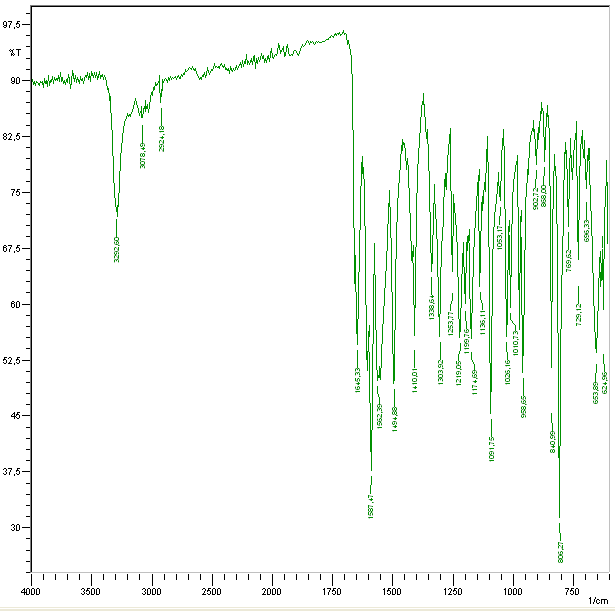


**Figure S28**. IR spectrum for **14**.


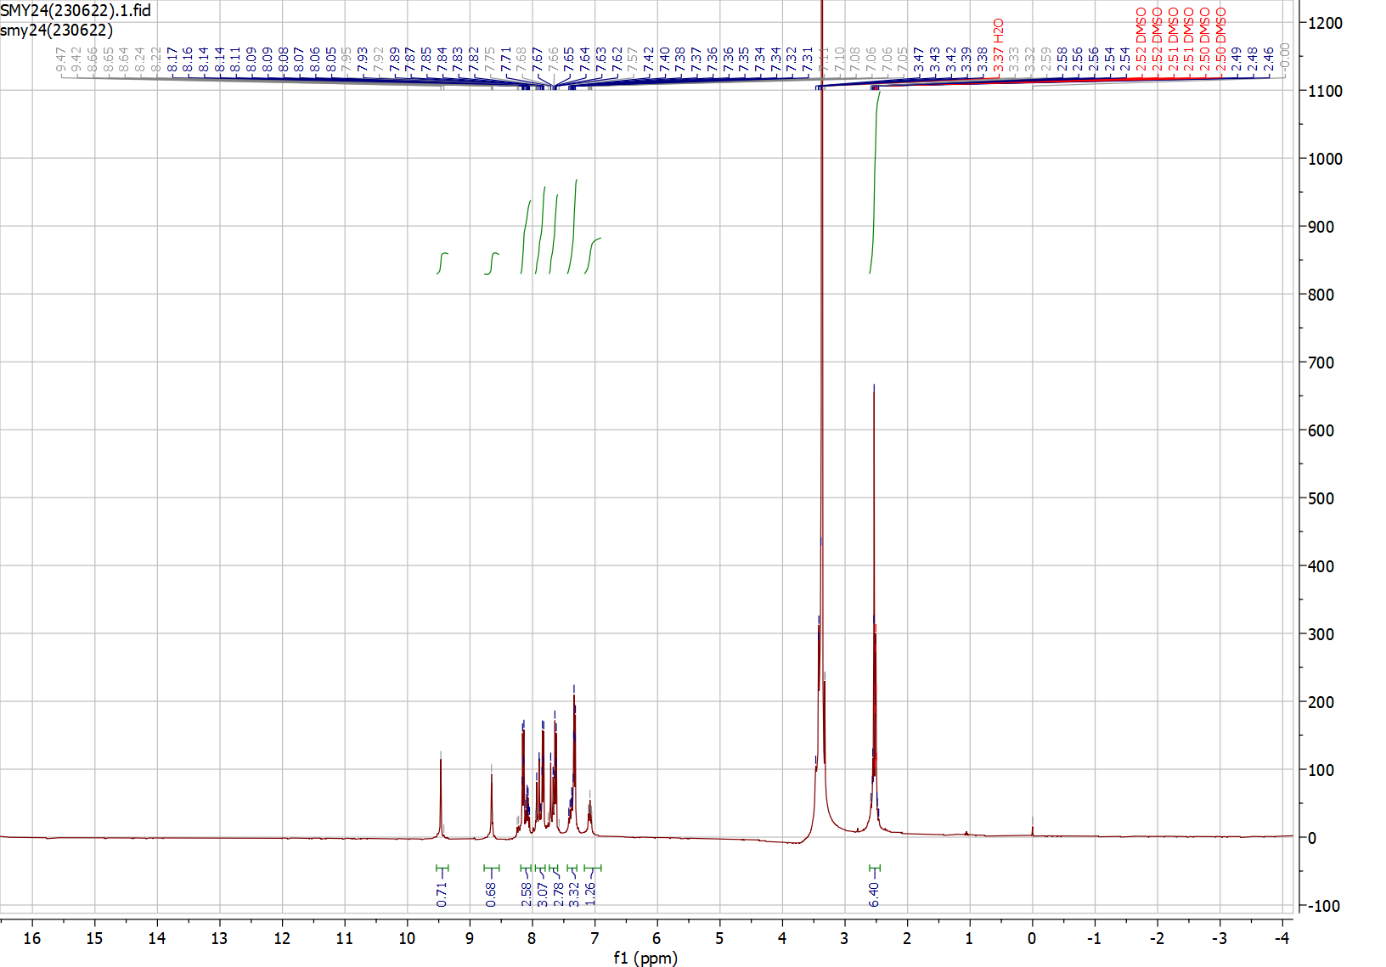


**Figure S29**. 1H-NMR spectrum for **14**.


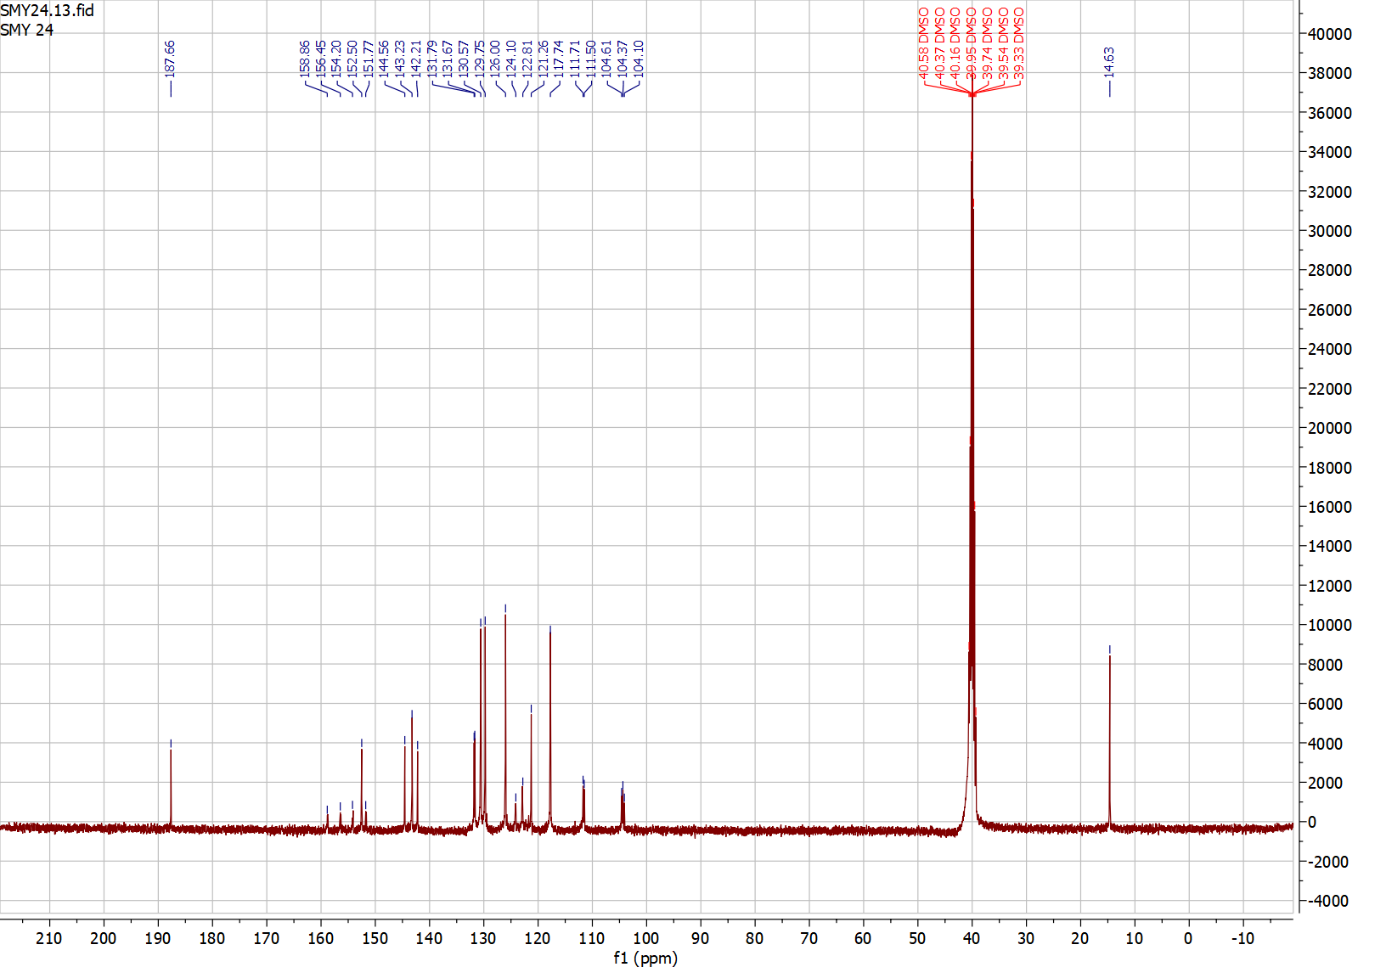


**Figure S30**. 13C-NMR spectrum for **14**.
